# Supplementary material for: Hellenic Association for the Study of the Liver (HASL): revised clinical practice guidelines for autoimmune hepatitis
Source: PubMed Central journal article supplement — Ann Gastroenterol. 2024 Oct 24;37(6):623–54. doi: 10.20524/aog.2024.0924 (PMC11574148; doi:10.20524/aog.2024.0924), 2024-10-24
Supplement: AnnGastroenterol-37-623_Suppl1.pdf [file AnnGastroenterol-37-623_Suppl1.pdf]

## Supplementary material

**Supplementary Table 1** Diagnostic criteria for AIH-PBC variant (adapted from [75])

|                                                                                                 |
|-------------------------------------------------------------------------------------------------|
| PBC criteria*                                                                                   |
| ALP > 2×ULN or γ-GT > 5×ULN                                                                     |
| AMA ≥ 1:40                                                                                      |
| Liver biopsy showing florid bile duct lesions                                                   |
| AIH criteria*                                                                                   |
| ALT > 5×ULN                                                                                     |
| IgG > 2×ULN or a positive test for SMA                                                          |
| Liver biopsy showing moderate or severe periportal or periseptal lymphocytic piecemeal necrosis |

\*At least 2 of the 3 criteria should be satisfied for each disease  
*PBC, primary biliary cholangitis; AIH, autoimmune hepatitis; ALP, alkaline phosphatase; ULN, upper limit of normal; AMA, antimitochondrial antibodies; ALT, alanine aminotransferase; IgG, immunoglobulin G; SMA, smooth muscle antibodies*

**Supplementary Table 2** New diagnostic score for AIH-PBC variant diagnosis (adapted from [76])

| Component                   | Result                 | Score    |
|-----------------------------|------------------------|----------|
| <b>Biochemical category</b> |                        |          |
| AST or ALT above ULN        | >2                     | +3       |
|                             | 1.5-2                  | +2       |
|                             | 1-1.5                  | +1       |
|                             | <1                     | 0        |
| ALP above ULN               | >1                     | +2       |
|                             | 0.75-1                 | +1       |
|                             | <0.75                  | 0        |
| Serum globulin above ULN    | >1.5                   | +2       |
|                             | 1-1.5                  | +1       |
|                             | <1                     | 0        |
| <b>Immunologic category</b> |                        |          |
| ANA, SMA, or LKM1           | >1:80                  | +3       |
|                             | 1:80                   | +2       |
|                             | 1:40                   | +1       |
|                             | <1:40                  | 0        |
| <b>Or</b>                   |                        |          |
| anti-SLA/LP, pANCA          | Positive               | +2       |
| AMA                         | Positive               | +3       |
| <b>Histologic category</b>  |                        |          |
|                             | Interface hepatitis    | +3       |
|                             | Lymphoplasmacytic      |          |
|                             | Hepatic rosettes       | +1       |
|                             | Granulomas             | +3       |
|                             | Florid ductal lesion   | +1       |
|                             | Ductular proliferation | +1       |
|                             | Bile duct loss         | +1       |
| <b>Others category</b>      |                        |          |
| Viral markers               | Positive               | -3       |
|                             | Negative               | +3       |
| Drugs                       | Yes                    | -4       |
|                             | No                     | +1       |
| Alcohol                     | <25 g/day              | +2       |
|                             | >60 g/day              | -2       |
| Interpretation of score     | Definitive             | ≥21      |
|                             | Probable               | 19 or 20 |
|                             | Rejected               | <19      |

*AIH, autoimmune hepatitis; PBC, primary biliary cholangitis; AST, aspartate aminotransferase; ALT, alanine aminotransferase; ALP, alkaline phosphatase; ULN, upper limit of normal; ANA, antinuclear antibodies; SMA, smooth muscle antibodies; anti-LKM1, live kidney microsomal type 1 antibodies; anti-SLA/LP, antibodies against soluble liver antigens/liver pancreas; pANCA, perinuclear anti-neutrophil cytoplasmic antibodies; AMA, antimitochondrial antibodies*

**Supplementary Table 3** Simplified criteria for the diagnosis of autoimmune hepatitis (adapted from [70])

| Parameter                                                                 | Finding                                                 | Points                                 |
|---------------------------------------------------------------------------|---------------------------------------------------------|----------------------------------------|
| ANA or SMA positive                                                       | ≥ 1:40                                                  | +1                                     |
| ANA or SMA positive<br>or anti-LKM positive<br>or anti-SLA/LP<br>positive | ≥ 1:80<br>≥ 1:40<br>Positive                            | +2*                                    |
| Liver histology<br>(presence<br>of hepatitis is<br>necessary)             | Typical AIH**<br>Compatible<br>with AIH**<br>Atypical** | +2<br>+1<br>0                          |
| Serum IgG levels                                                          | > ULN<br>> 1.1 x ULN                                    | +1<br>+2                               |
| Absence of viral<br>hepatitis***                                          | Yes<br>No                                               | +2<br>0                                |
| Sum                                                                       |                                                         | ≥ 6: Probable AIH<br>≥ 7: Definite AIH |

\*Addition of points achieved for all autoantibodies (maximum, 2 points).

\*\*Definition of typical lesions as in ref. 74; Compatible liver histology: chronic hepatitis with lymphocytic infiltration without all the features considered typical; Atypical: histological lesions supporting another diagnosis.

\*\*\*In chronic cases absence of hepatitis B and C viral markers; in acute cases absence of serological markers of acute hepatitis A, B, C, D and E is needed. ANA or SMA detection refers to the use of immunofluorescence assay on rodent tissues, not ELISA

ANA, antinuclear antibodies; SMA, smooth muscle antibodies; anti-LKM1, live kidney microsomal type 1 antibodies; anti-SLA/LP, antibodies against soluble liver antigens/liver pancreas; AIH, autoimmune hepatitis; IgG, immunoglobulin G; ULN, upper limit of normal; ELISA, enzyme-linked immunosorbent assay

**Supplementary Table 4** Proposed scoring criteria for the diagnosis of AIH and AIH-PSC variant in the pediatric population (adapted from [83])

| Characteristic                                                             | Cutoff     | AIH points | AIH-PSC points |
|----------------------------------------------------------------------------|------------|------------|----------------|
| ANA and/or SMA*                                                            | ≥1:20**    | 1          | 1              |
|                                                                            | ≥1:80      | 2          | 2              |
| Anti-LKM1 <sup>+</sup> or                                                  | ≥1:10**    | 1          | 1              |
|                                                                            | ≥1:80      | 2          | 1              |
| Anti-LC1                                                                   | Positive** | 2          | 1              |
| Anti-SLA/LP                                                                | Positive** | 2          | 2              |
| pANNA                                                                      | Positive   | 1          | 2              |
| IgG                                                                        | >ULN       | 1          | 1              |
|                                                                            | >1.2 ULN   | 2          | 2              |
| Liver histology                                                            | Compatible | 1          | 1              |
|                                                                            | Typical    | 2          | 2              |
| Absence of viral hepatitis (A, B, E, EBV), MASH, Wilson, and drug exposure | Yes        | 2          | 2              |
| Extrahepatic autoimmunity                                                  | Yes        | 1          | 1              |
| Family history of autoimmune disease                                       | Yes        | 1          | 1              |
| Cholangiography                                                            | Normal     | 2          | -2             |
|                                                                            | Abnormal   | -2         | 2              |

Score ≥7 = Probable AIH; ≥8: Definite AIH. Score ≥7: Probable AIH-PSC; ≥8: Definite AIH-PSC.

\*Antibodies measured by immunofluorescence assay on a composite rodent substrate (kidney, liver, stomach).

\*\*Addition of points achieved for ANA, SMA, anti-LKM-1, anti-LC-1, and anti-SLA/LP autoantibodies cannot exceed a maximum of 2 points

*AIH, autoimmune hepatitis; AIH-PSC, autoimmune hepatitis – primary sclerosing cholangitis; ANA, antinuclear antibody; SMA, smooth muscle antibodies; anti-LKM-1, anti-liver kidney microsomal antibody type 1; anti-LC-1, anti-liver cytosol type 1; anti-SLA/LP, anti-soluble liver antigen/liver pancreas; pANNA, peripheral antinuclear neutrophil antibodies; IgG, immunoglobulin G; ULN, upper limit of normal, EBV, Epstein-Barr virus; MASH, metabolic-dysfunction associated steatohepatitis*
